# Supplementary material for: Scrophularia koraiensis Nakai Attenuates Allergic Airway Inflammation via Suppression of NF-κB and Enhancement of Nrf2/HO-1 Signaling
Source: PubMed Central journal article supplement (PMC7070852; doi:10.3390/antiox9020099), 2020-01-24
Supplement: antioxidants-09-00099-s001.pdf [file antioxidants-09-00099-s001.pdf]

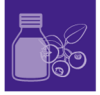

**Table S1.** Comparison of morphological characteristics in two species in *Scrophularia*.

|                      | <i>Scrophularia buergeriana</i> | <i>Scrophularia koraiensis</i> |
|----------------------|---------------------------------|--------------------------------|
| Apex of leaf blade   | acute                           | acuminate                      |
| Base of leaf blade   | usually truncate                | usually obtuse                 |
| Margin of leaf blade | regularly double serrate        | regularly double serrate       |
| Calyx lobes          | ovate                           | acuminate                      |

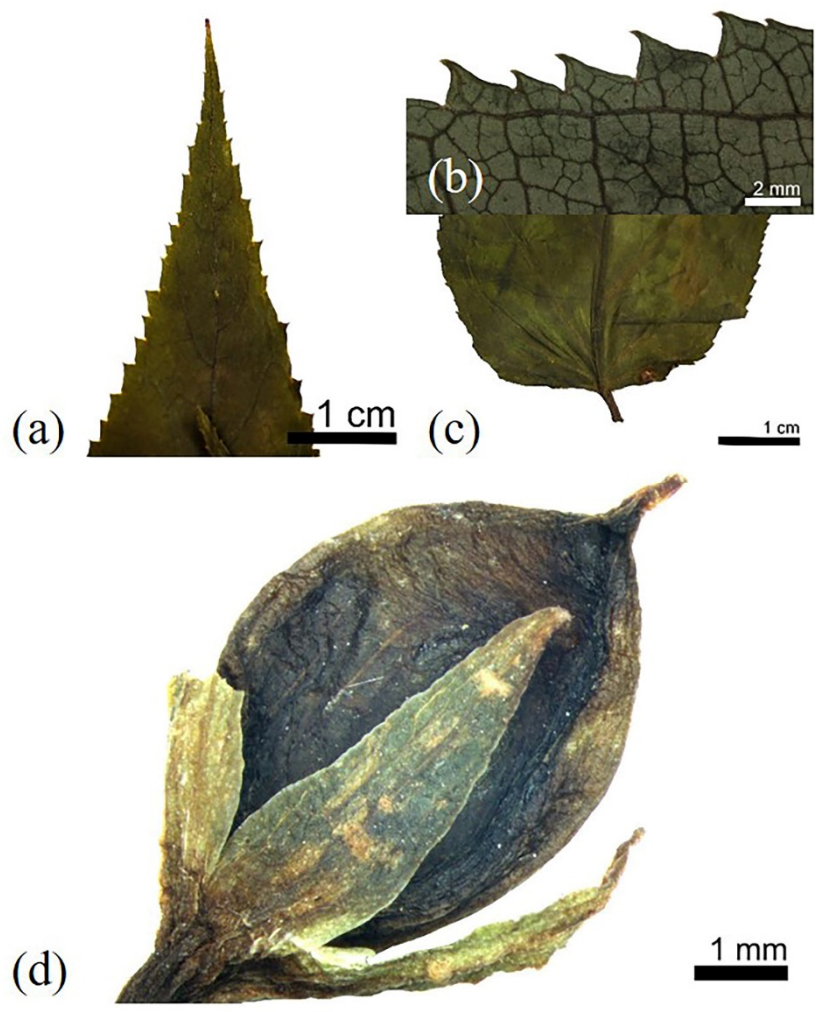

**Figure S1.** Stereomicroscope micrographs showing the external morphology of *Scrophularia koraiensis* Nakai. (a) Apex of leaf blade. (b) Margin of leaf blade. (c) Base of leaf blade. (d) Fruit and calyx.
